# Supplementary material for: Structural and mutational analyses of the Leptospira interrogans virulence-related heme oxygenase provide insights into its catalytic mechanism
Source: PubMed Central journal article supplement (PMC5542595; doi:10.1371/journal.pone.0182535), 2017-08-03

**S1 Fig. Mechanism of heme degradation by heme oxygenase.**

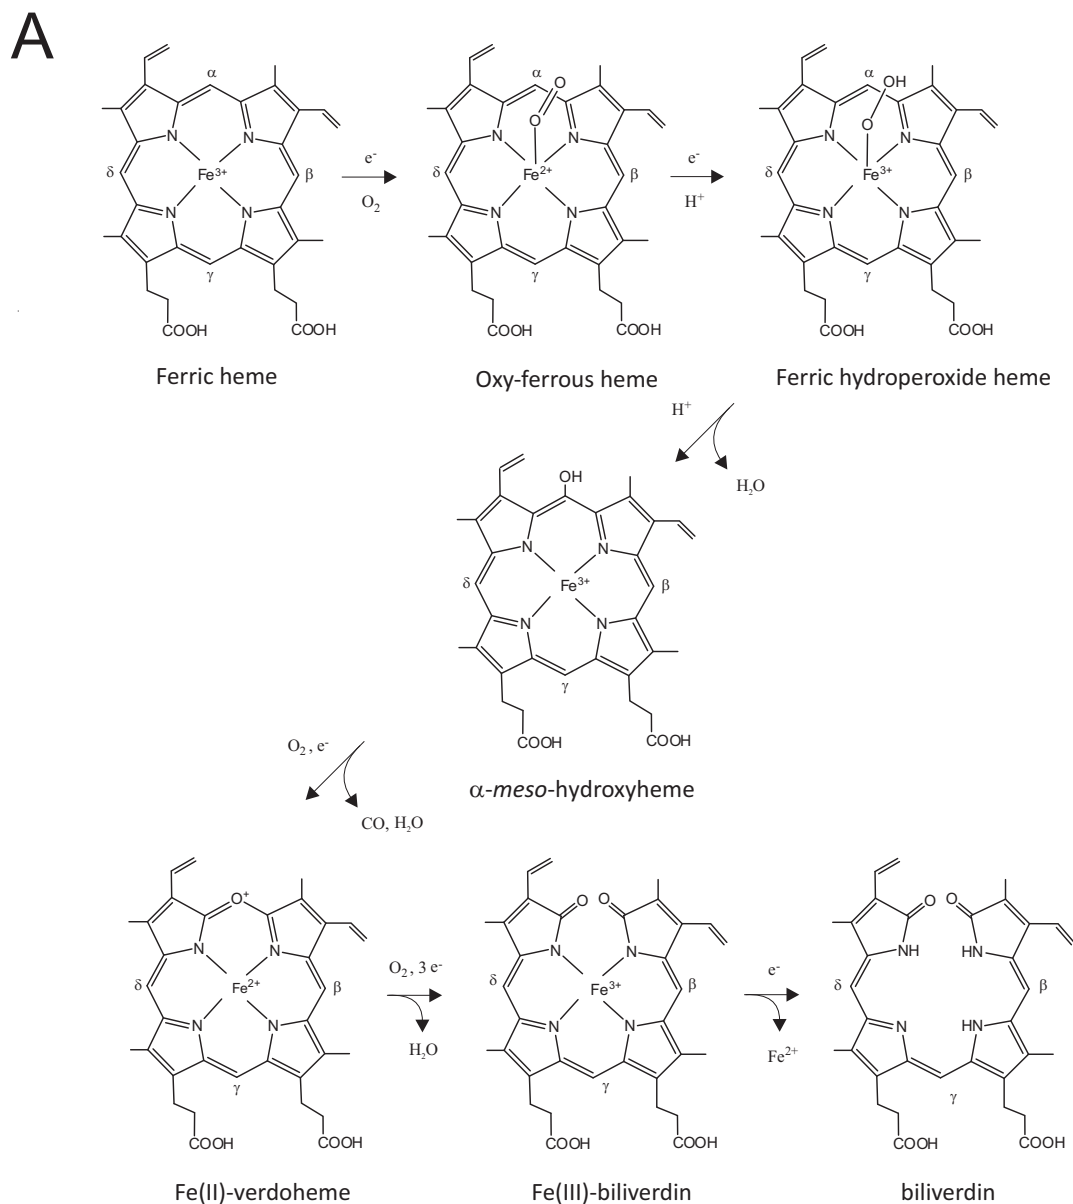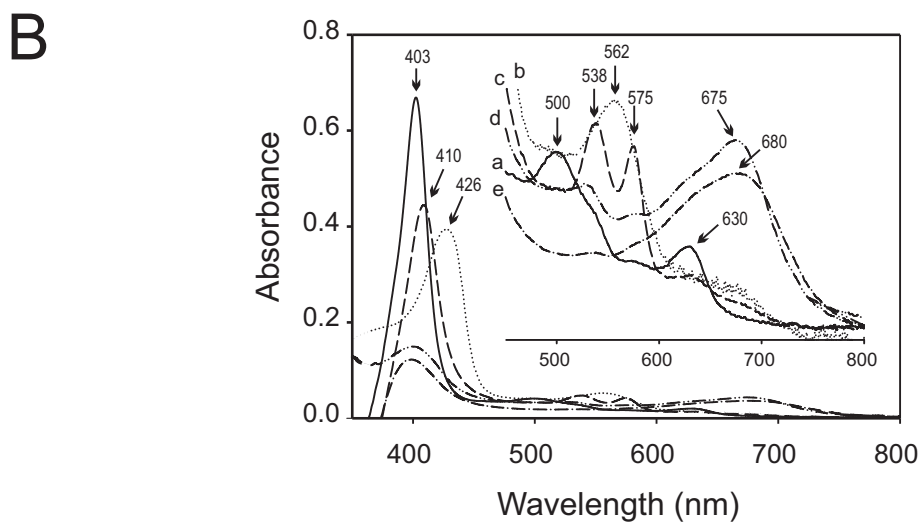

Supplement: pone.0182535.s001.pdf [file pone.0182535.s001.pdf]
