# Supplementary material for: Structural and mutational analyses of the Leptospira interrogans virulence-related heme oxygenase provide insights into its catalytic mechanism
Source: PubMed Central journal article supplement (PMC5542595; doi:10.1371/journal.pone.0182535), 2017-08-03

S2 Fig. Predicted cartoon model of the LepHO structure

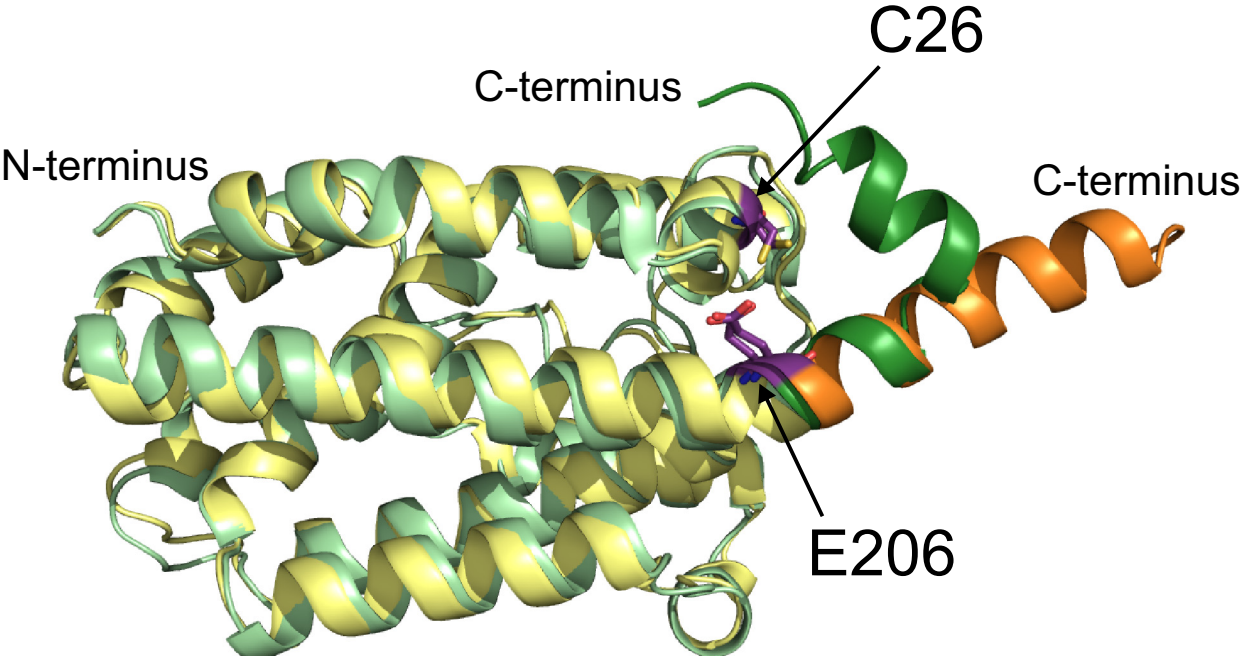

Supplement: pone.0182535.s002.pdf [file pone.0182535.s002.pdf]
