# Supplementary material for: Structural and mutational analyses of the Leptospira interrogans virulence-related heme oxygenase provide insights into its catalytic mechanism
Source: PubMed Central journal article supplement (PMC5542595; doi:10.1371/journal.pone.0182535), 2017-08-03

**S7 Fig. Catalytic turnover of heme by LepHO in the presence of ascorbate.**

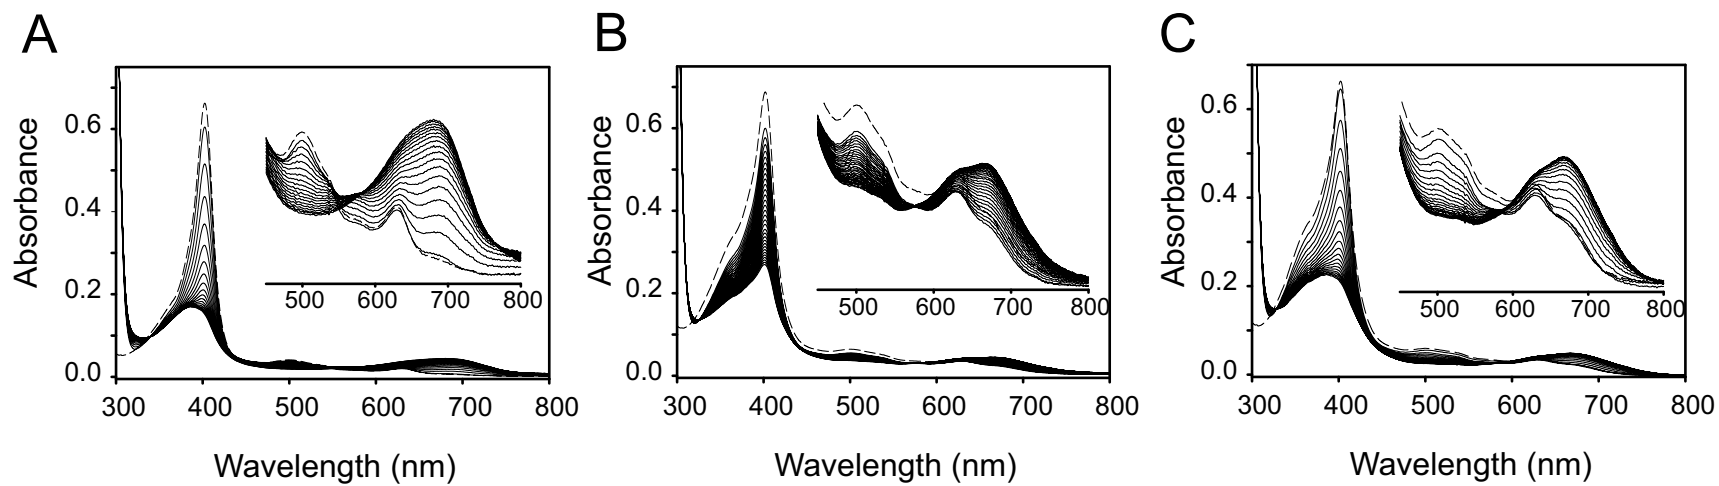

Supplement: pone.0182535.s007.pdf [file pone.0182535.s007.pdf]
