# Supplementary material for: Structural and mutational analyses of the Leptospira interrogans virulence-related heme oxygenase provide insights into its catalytic mechanism
Source: PubMed Central journal article supplement (PMC5542595; doi:10.1371/journal.pone.0182535), 2017-08-03

S8 Fig. Analysis of the LepFNR-LepHO interaction by chemical crosslinking.

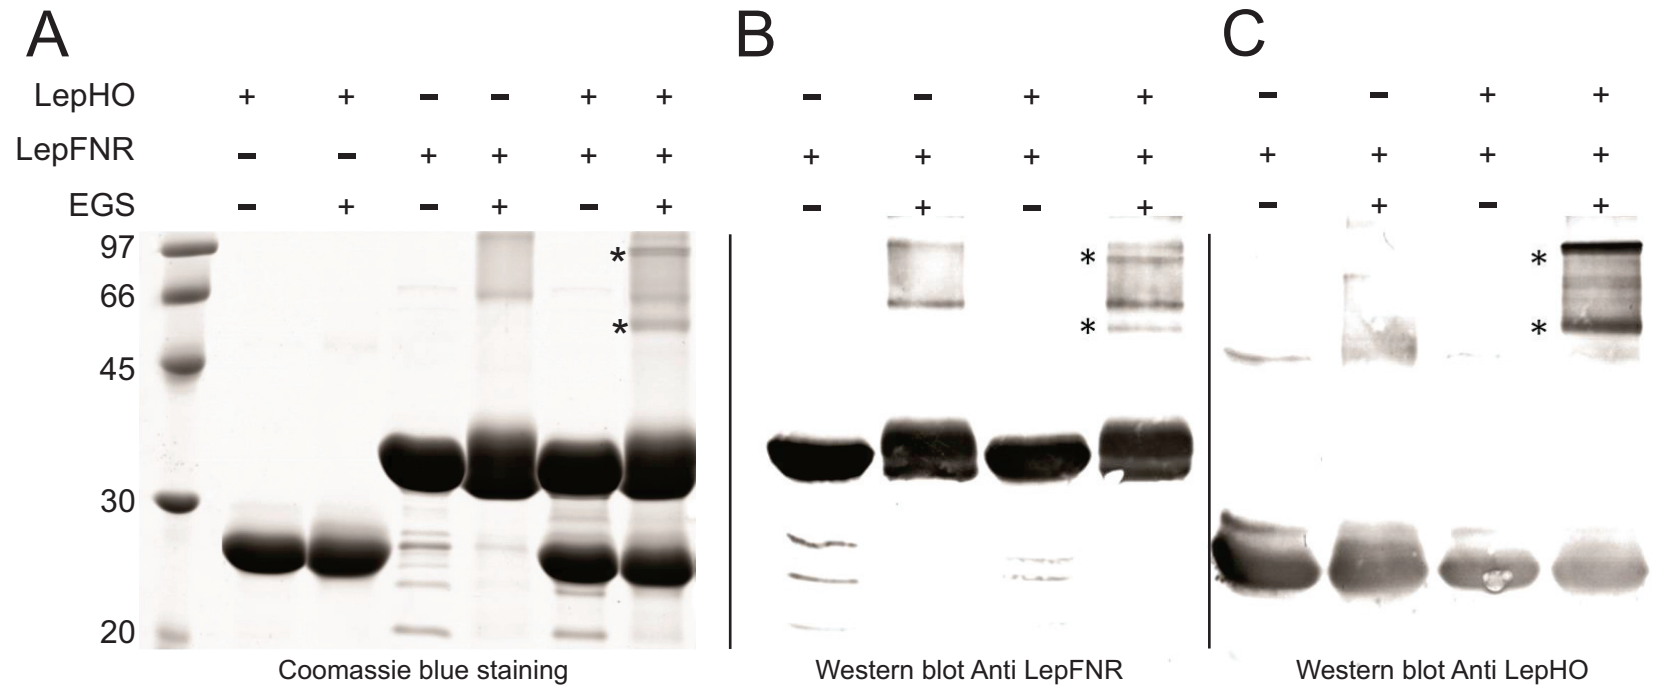

Supplement: pone.0182535.s008.pdf [file pone.0182535.s008.pdf]
