# Supplementary material for: Structural and mutational analyses of the Leptospira interrogans virulence-related heme oxygenase provide insights into its catalytic mechanism
Source: PubMed Central journal article supplement (PMC5542595; doi:10.1371/journal.pone.0182535), 2017-08-03

**S9 Fig. Evaluation of the spectroscopic characteristics of LepFNR and LepFNR $\Delta$ K84-G90, and their capabilities to supporting heme degradation by LepHO.**

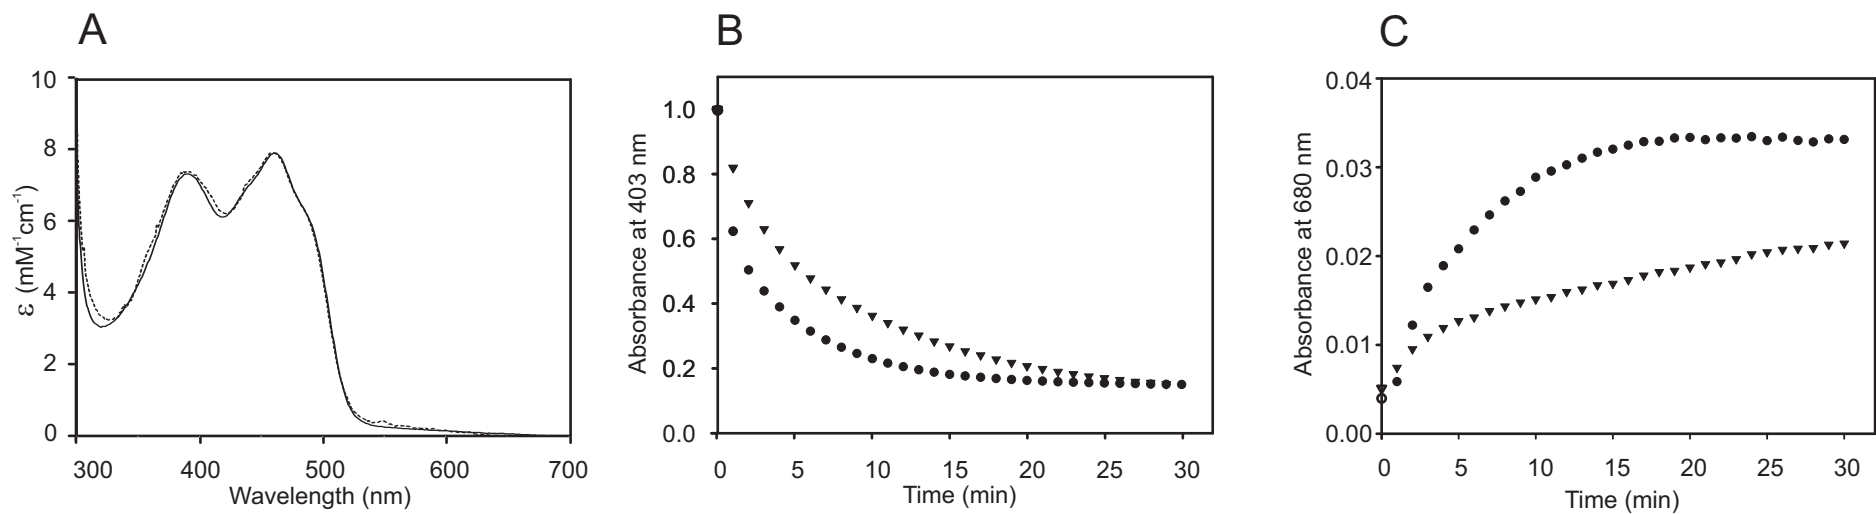

Supplement: pone.0182535.s009.pdf [file pone.0182535.s009.pdf]
